# Supplementary material for: Esomeprazole attenuates inflammatory and fibrotic response in lung cells through the MAPK/Nrf2/HO1 pathway
Source: PubMed Central journal article supplement (PMC8136131; doi:10.1186/s12950-021-00284-6), 2021-05-19

## Supplemental Data

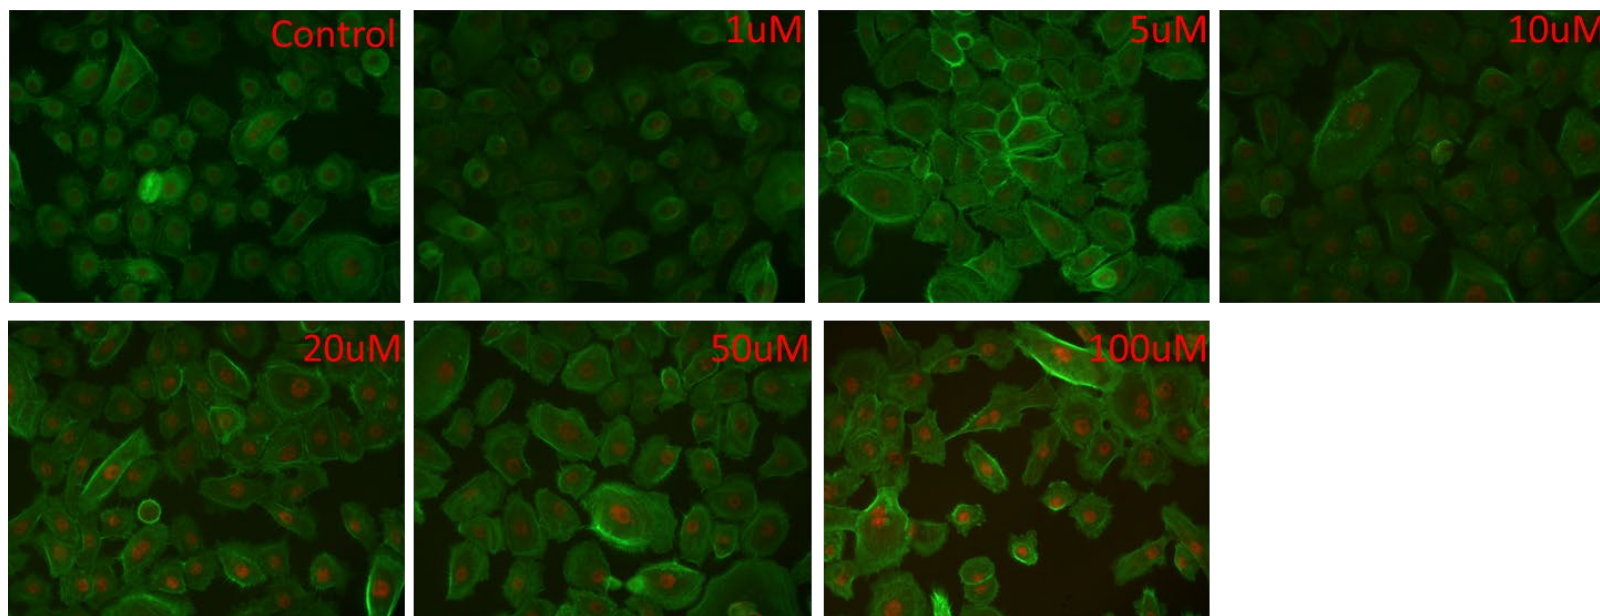

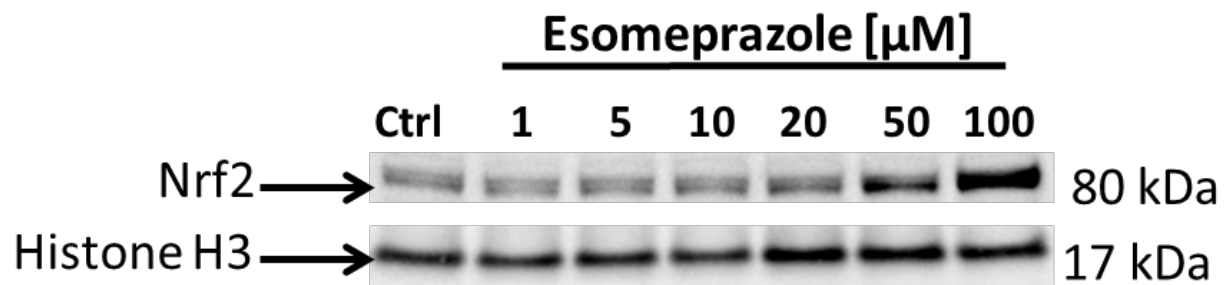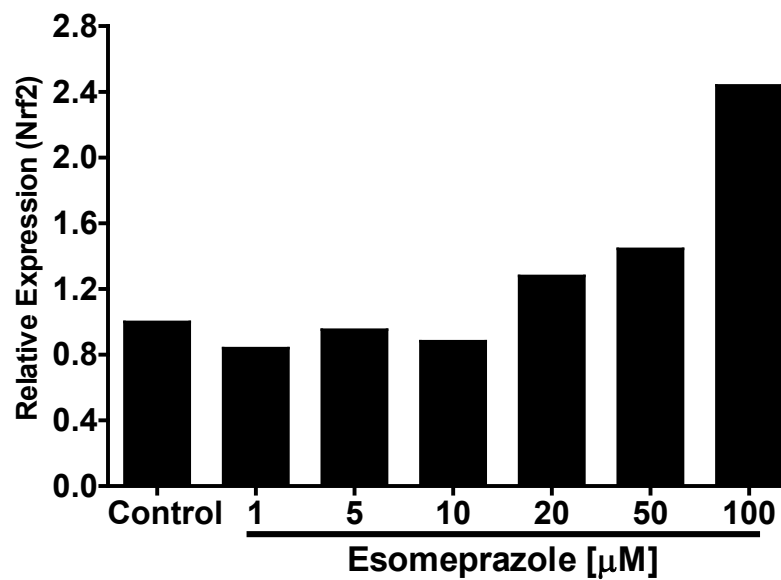

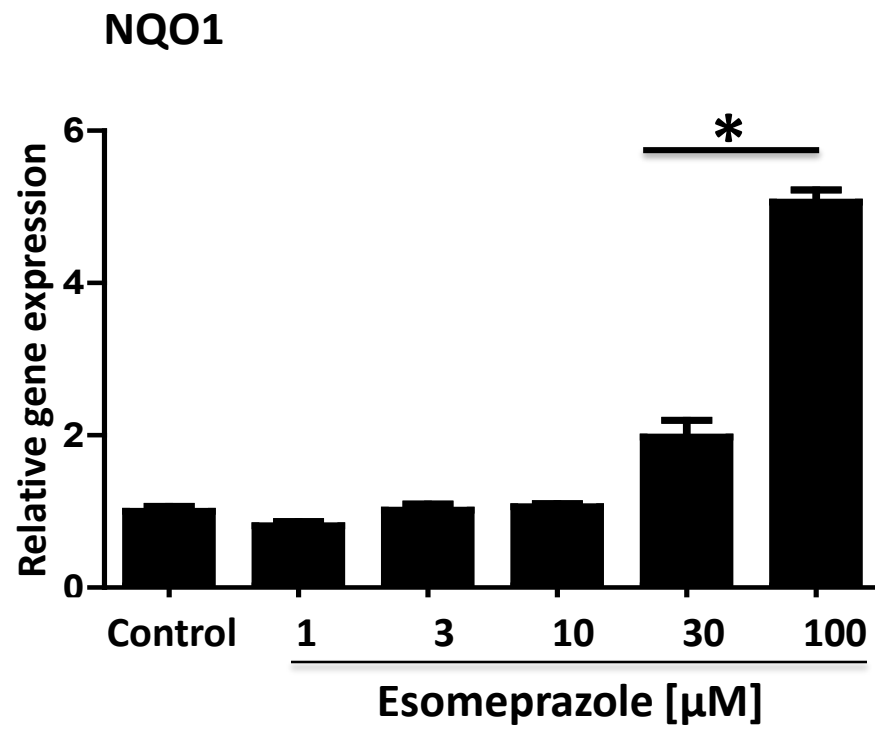

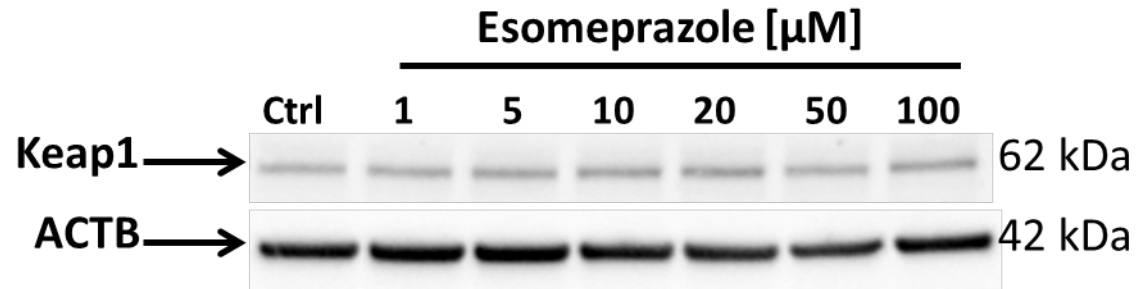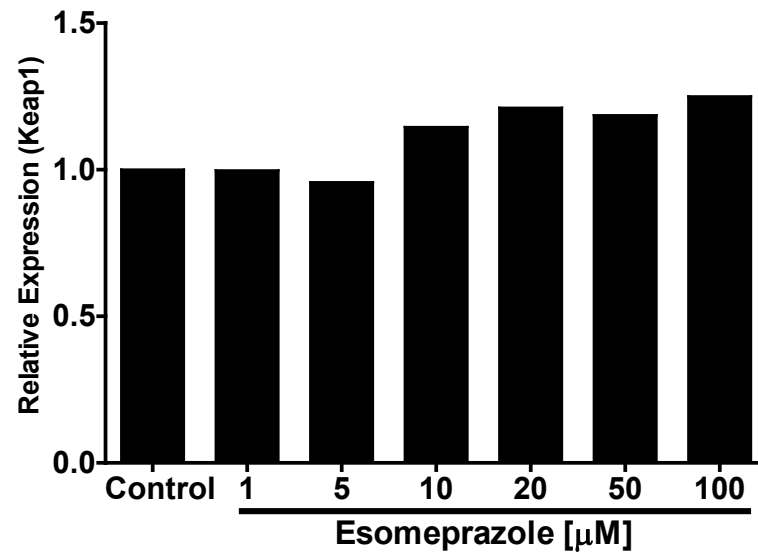

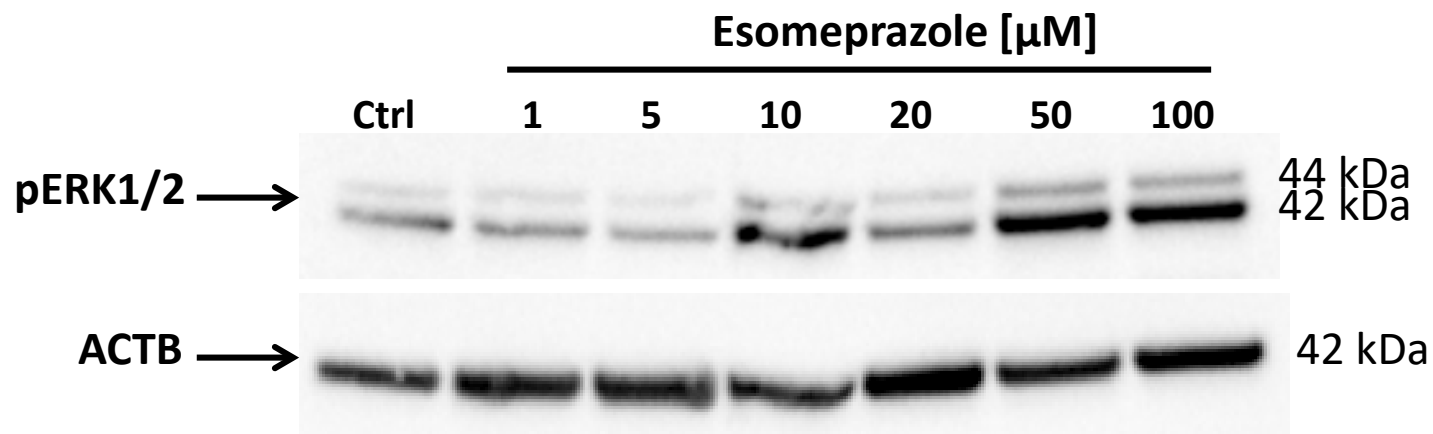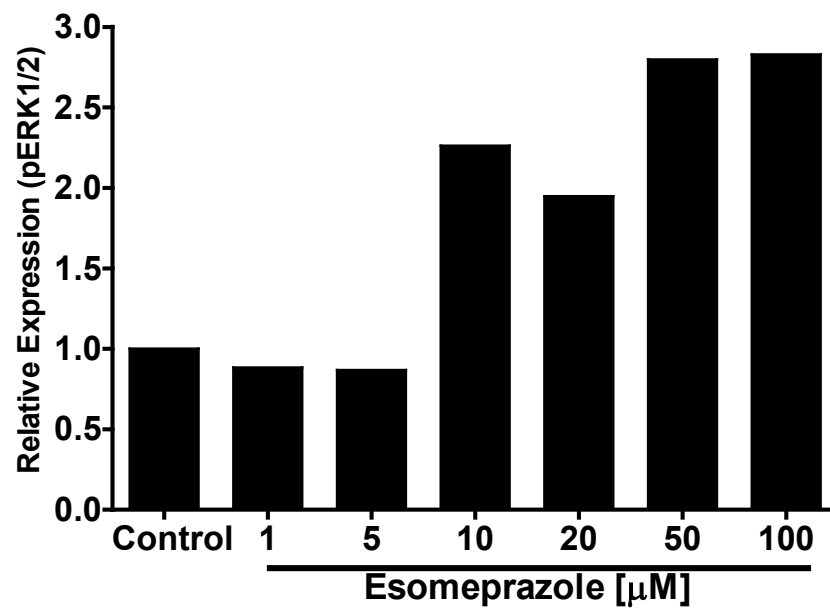

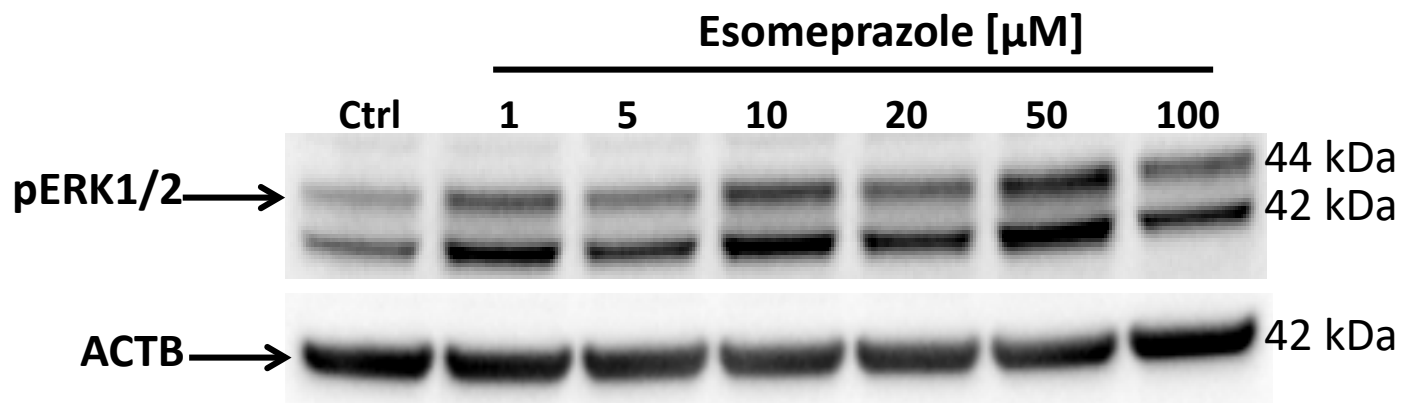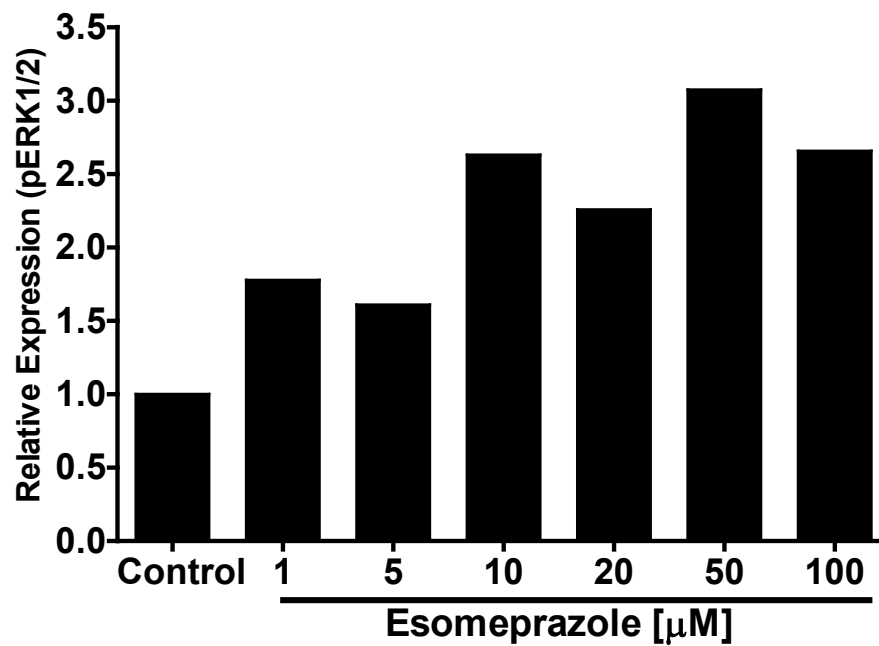

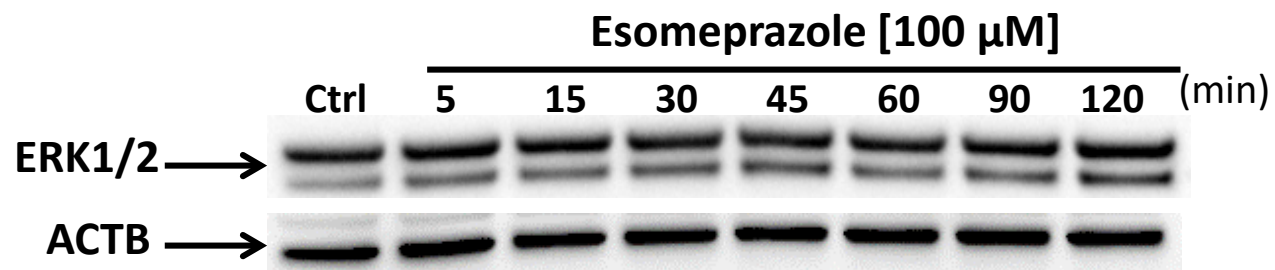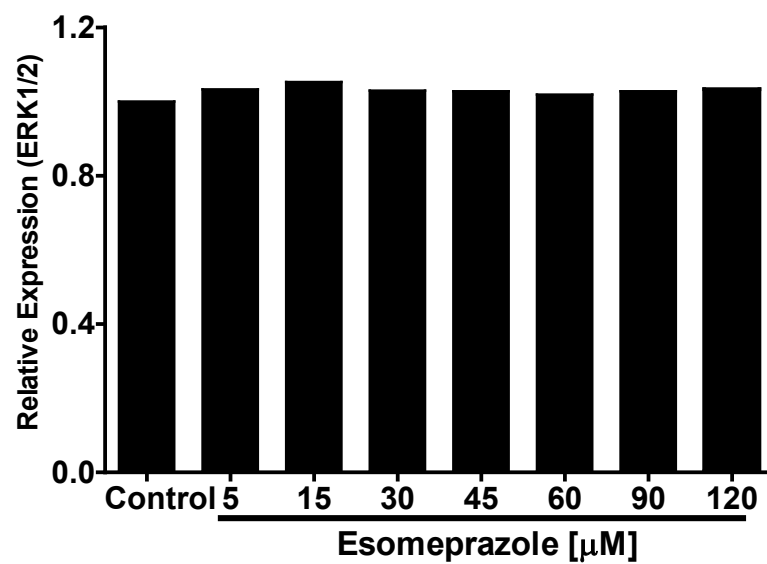



Figure S8

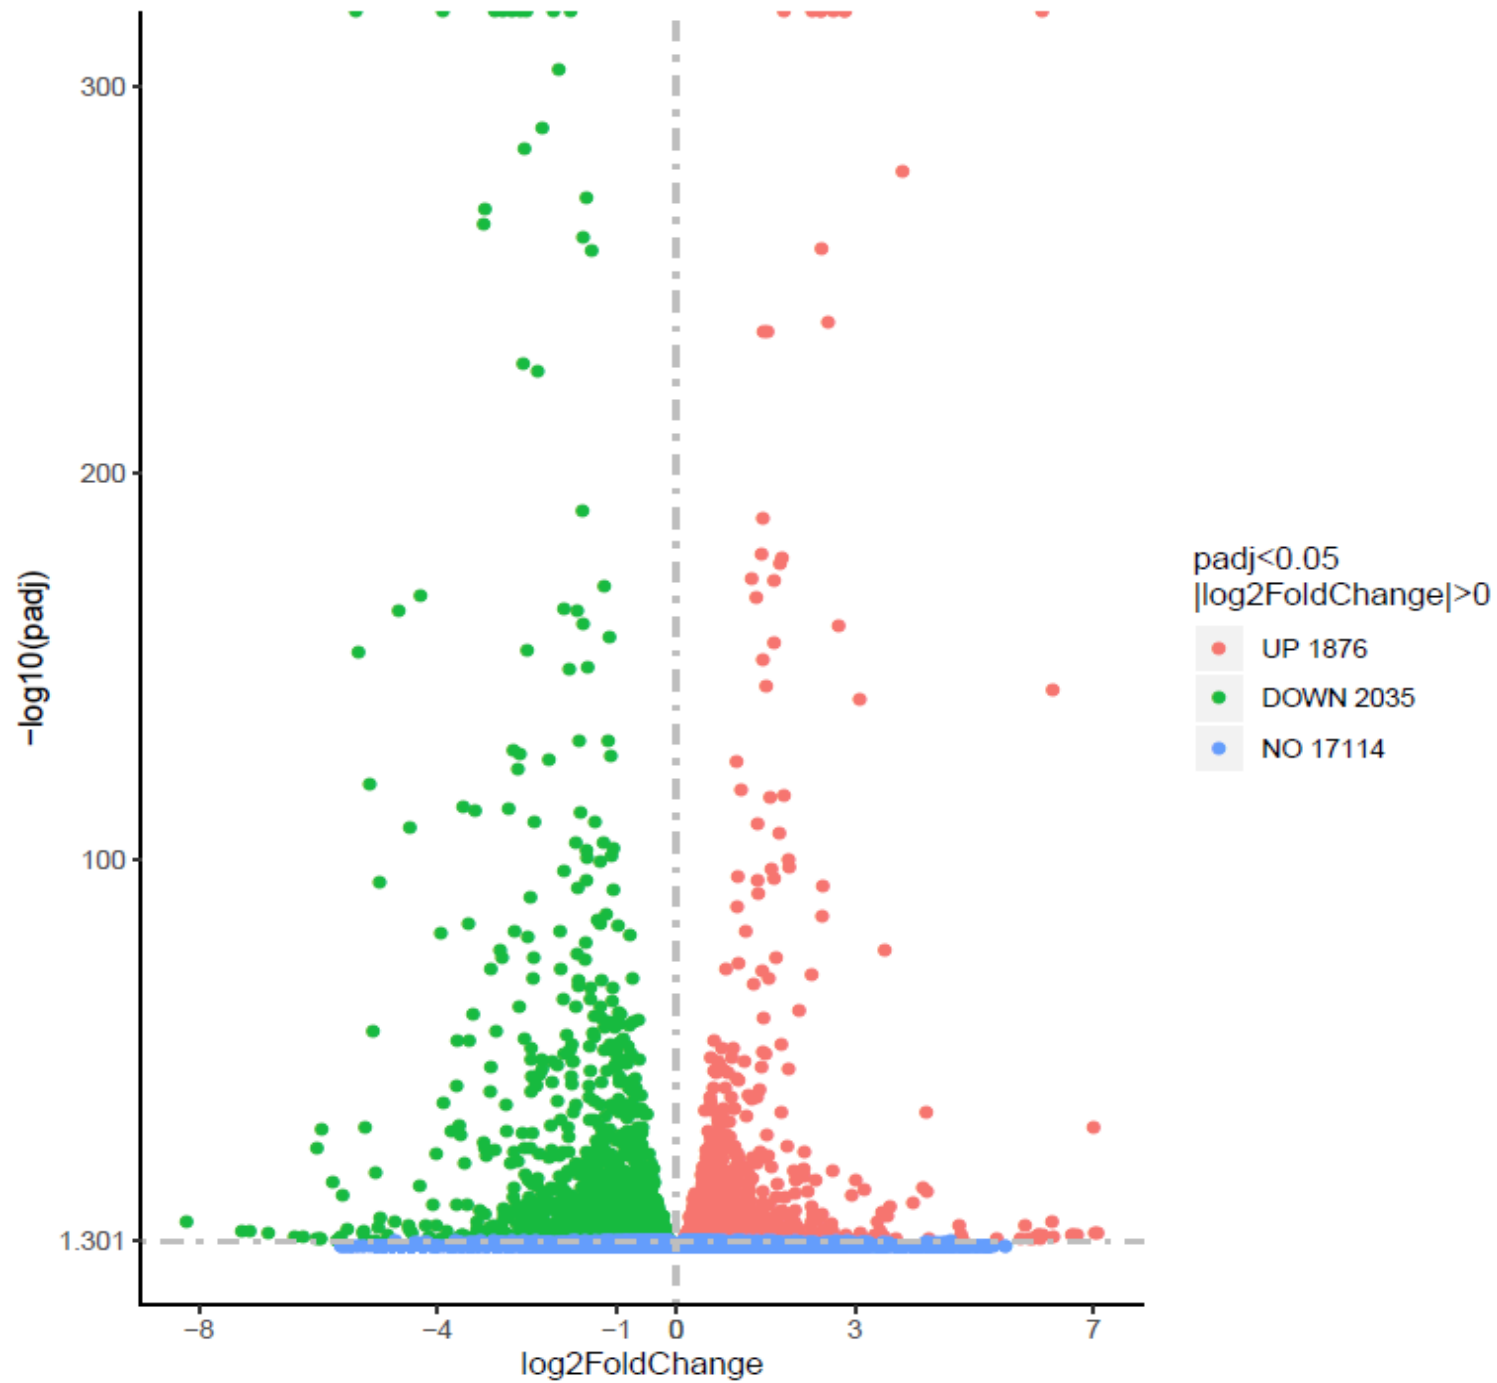

Supplement: 12950_2021_284_MOESM4_ESM.pdf [file 12950_2021_284_MOESM4_ESM.pdf]
